# Supplementary material for: A Theoretical Model for the Associative Nature of Conference Participation
Source: PLOS journal article supplement (doi:10.1371/journal.pone.0148528), 2016-02-09
Supplement: S1 (10.1371/journal.pone.0148528.s001) [file journal.pone.0148528.s001]

# Supplementary Information: A theoretical model for the associative nature of conference participation

Jelena Smiljanić<sup>1</sup>, Arnab Chatterjee<sup>3</sup>, Tomi Kauppinen<sup>4</sup>, and Marija Mitrović Dankulov<sup>1,\*</sup>

<sup>1</sup>Scientific Computing Laboratory, Institute of Physics Belgrade, University of Belgrade, Pregrevica 118, 11080 Belgrade, Serbia

<sup>2</sup>School of Electrical Engineering, University of Belgrade, P.O. Box 35-54, 11120 Belgrade, Serbia

<sup>3</sup>Condensed Matter Physics Division, Saha Institute of Nuclear Physics, 1/AF Bidhannagar, Kolkata 700064, India

<sup>4</sup>Aalto University School of Science, P.O. Box 11000. FI-00076 AALTO, Finland  
\*mitrovic@ipb.ac.rs

January 23, 2016

## 1 Data

### 1.1 Conference description

The American Physical Society March Meeting (APSMM) is the world's largest condensed matter physics conference with more than 70 years history. It is organized annually at various locations in The United States. The conference attracts researchers from research institutions, universities, and industry from all around the world.

The APS April Meeting (APSAM) conference is dedicated to the topics from the astrophysics, gravitational physics, nuclear physics, and particle physics. Likewise March Meeting, the conference takes place at various locations in The United States each year.

The Annual Meeting of the Society for Industrial and Applied Mathematics (SIAM) has been held since 1984 at various locations in The North America. Topics covered at the SIAM conferences include applied and computational mathematics and applications.

The Neural Information Processing Systems (NIPS) Conference has been held since 1988 at various locations in The United States, Canada and Spain. Neural information processing intends to emerge fields such as machine learning, statistics, applied mathematics and physics. The acceptance rate is about 50%.

The aim of The International Conference on Supercomputing (ICS) is to promote an international forum for the presentation and discussion on the various aspects of high-performance computing systems. The ICS conference has been sponsored by The Association for Computing Machinery (ACM). The conference is organized annually since 1988 at various locations. The overall acceptance rate is 26%.

The Annual International Conference on Research in Computational Molecular Biology (RECOMB) has been held since 1997 at various locations. At RECOMB emphasis is placed on connecting the biological, computational, and statistical sciences. The overall acceptance rate is 20%.

The list of links to the conference data and proceedings is given in Table A, while the Table C lists the sizes of all six conferences for all years covered in the data set. The number of participants is calculated after the name disambiguation.

## 1.2 Data description

| Conference | Link to the conference data set                                                                                   |
|------------|-------------------------------------------------------------------------------------------------------------------|
| APSMM      | <a href="http://www.aps.org/meetings/baps/">http://www.aps.org/meetings/baps/</a>                                 |
| APSAM      | <a href="http://www.aps.org/meetings/baps/">http://www.aps.org/meetings/baps/</a>                                 |
| SIAM       | <a href="http://www.siam.org/meetings/archives.php#AN">http://www.siam.org/meetings/archives.php#AN</a>           |
| NIPS       | <a href="http://papers.nips.cc/">http://papers.nips.cc/</a>                                                       |
| ICS        | <a href="http://dl.acm.org/event.cfm?id=RE215&amp;tab=pubs">http://dl.acm.org/event.cfm?id=RE215&amp;tab=pubs</a> |
| RECOMB     | <a href="http://www.recomb.org/history">http://www.recomb.org/history</a>                                         |

Table A: Pages on the web from which we downloaded conference data.

| <i>Conference</i> | $Y_0$ | $Y_f$ | <i>Number of participants</i> |
|-------------------|-------|-------|-------------------------------|
| APSMM             | 1994  | 2014  | 78544                         |
| APSAM *           | 1994  | 2014  | 16264                         |
| SIAM **           | 1994  | 2014  | 8879                          |
| NIPS              | 1988  | 2014  | 6902                          |
| ICS               | 1988  | 2014  | 2504                          |
| RECOMB            | 1997  | 2014  | 1564                          |

\* Data are not available for 1999.

\*\* Data are not available for 2007 and 2011.

Table B: Summary of the conference data. Columns 2 and 3 indicate for each conference the year in which data we have collected begin ( $Y_0$ ) and end ( $Y_f$ ). The total number of different participants at the conference during that period of time is given in column 4.

|      | APSM  | APSAM | SIAM | NIPS | ICS | RECOMB |
|------|-------|-------|------|------|-----|--------|
| 1988 | -     | -     | -    | 214  | 132 | -      |
| 1989 | -     | -     | -    | 205  | 121 | -      |
| 1990 | -     | -     | -    | 297  | 123 | -      |
| 1991 | -     | -     | -    | 302  | 116 | -      |
| 1992 | -     | -     | -    | 270  | 112 | -      |
| 1993 | -     | -     | -    | 301  | 114 | -      |
| 1994 | 9660  | 3309  | 540  | 270  | 114 | -      |
| 1995 | 9897  | 1947  | 425  | 292  | 144 | -      |
| 1996 | 9991  | 2356  | 279  | 289  | 127 | -      |
| 1997 | 9191  | 3388  | 579  | 289  | 109 | 111    |
| 1998 | 10924 | 2301  | 456  | 298  | 158 | 120    |
| 1999 | 20426 | -     | 367  | 296  | 172 | 121    |
| 2000 | 10816 | 1744  | 403  | 307  | 105 | 150    |
| 2001 | 12401 | 1818  | 823  | 396  | 146 | 101    |
| 2002 | 11944 | 2446  | 1115 | 432  | 118 | 98     |
| 2003 | 13548 | 2127  | 642  | 469  | 103 | 95     |
| 2004 | 14595 | 1668  | 767  | 492  | 102 | 136    |
| 2005 | 14673 | 1140  | 792  | 515  | 165 | 141    |
| 2006 | 16484 | 1008  | 945  | 479  | 124 | 154    |
| 2007 | 16655 | 943   | -    | 530  | 96  | 123    |
| 2008 | 16441 | 1473  | 1053 | 633  | 132 | 142    |
| 2009 | 16775 | 1630  | 1054 | 654  | 242 | 127    |
| 2010 | 17790 | 1342  | 1166 | 733  | 127 | 157    |
| 2011 | 18368 | 1088  | -    | 746  | 171 | 167    |
| 2012 | 22343 | 1480  | 1223 | 938  | 133 | 148    |
| 2013 | 21510 | 1430  | 1205 | 884  | 210 | 125    |
| 2014 | 22789 | 1704  | 1407 | 1064 | 147 | 137    |

Table C: The number of participants at the conference per year.

## 2 Functional fits

We use maximum-likelihood to estimate the parameters of three different functions, exponential, power-law and power-law with an exponential cutoff for the distributions of total number of participations, the number of and the time lag between two successive participations. Further on, we calculate the log-likelihood ratio,  $\mathcal{R}$ , and  $\pi$ -value [1] between different fits in order to estimate which of the three different functional forms the best fits with the empirical observations. The Tables D and E show  $\mathcal{R}$ , and  $\pi$ -value calculated for the comparison between truncated power-law and pure power-law for total and successive number of participations, while Table F shows the comparison between fits of exponential and truncated power-law to the distribution of time lags. These results and visual inspection show that the power-law with an exponential cutoff is the best fit for all three empirical distributions, and for all six conferences.

|        | $\mathcal{R}$ | $\pi$    |
|--------|---------------|----------|
| APSMM  | -1758.44      | 0.0      |
| APSAM  | -36.89        | 0.0      |
| SIAM   | -75.26        | 0.0      |
| NIPS   | -76.64        | 0.0      |
| ICS    | -8.54         | 3.60e-05 |
| RECOMB | -7.22         | 1.45e-04 |

Table D: Log likelihood ratio  $\mathcal{R}$  and the  $\pi$ -value compare the fit to the power-law with the fit to the power-law with an exponential cutoff for the probability distribution of number of conferences at which each author appears.

|        | $\mathcal{R}$ | $\pi$    |
|--------|---------------|----------|
| APSMM  | -554.05       | 0.0      |
| APSAM  | -0.77         | 0.21     |
| SIAM   | -17.98        | 2.01e-09 |
| NIPS   | -17.52        | 3.24e-09 |
| ICS    | -4.99         | 1.57e-03 |
| RECOMB | -1.48         | 0.09     |

Table E: Log likelihood ratio  $\mathcal{R}$  and the  $\pi$ -value compare the fit to the power-law with the fit to the power-law with an exponential cutoff for the probability distribution of the number of successive participations at the conference.

|        | $\mathcal{R}$ | $\pi$    |
|--------|---------------|----------|
| APSMM  | -756.91       | 0.0      |
| APSAM  | -34.59        | 1.11e-16 |
| SIAM   | -11.54        | 1.55e-06 |
| NIPS   | -58.22        | 0.0      |
| ICS    | -7.64         | 9.24e-05 |
| RECOMB | -3.60         | 7.27e-03 |

Table F: Log likelihood ratio  $\mathcal{R}$  and the  $\pi$ -value compare the fit to the exponential with the fit to the power-law with an exponential cutoff for the probability distribution of the time lag between two consecutive conference participations.

### 3 Model of conference attendance dynamics

#### 3.1 Participation probability

Figure A shows how the probability to attend the next meeting is changing with the number of previous attendances, calculated from the empirical data. We see that for all six conferences this probability grows for a small number of attendances. The saturation or decrease in the probability for a large number of previous participations, observed for some conferences, occurs due to a small number of observations for the large number of participations/length of pauses.

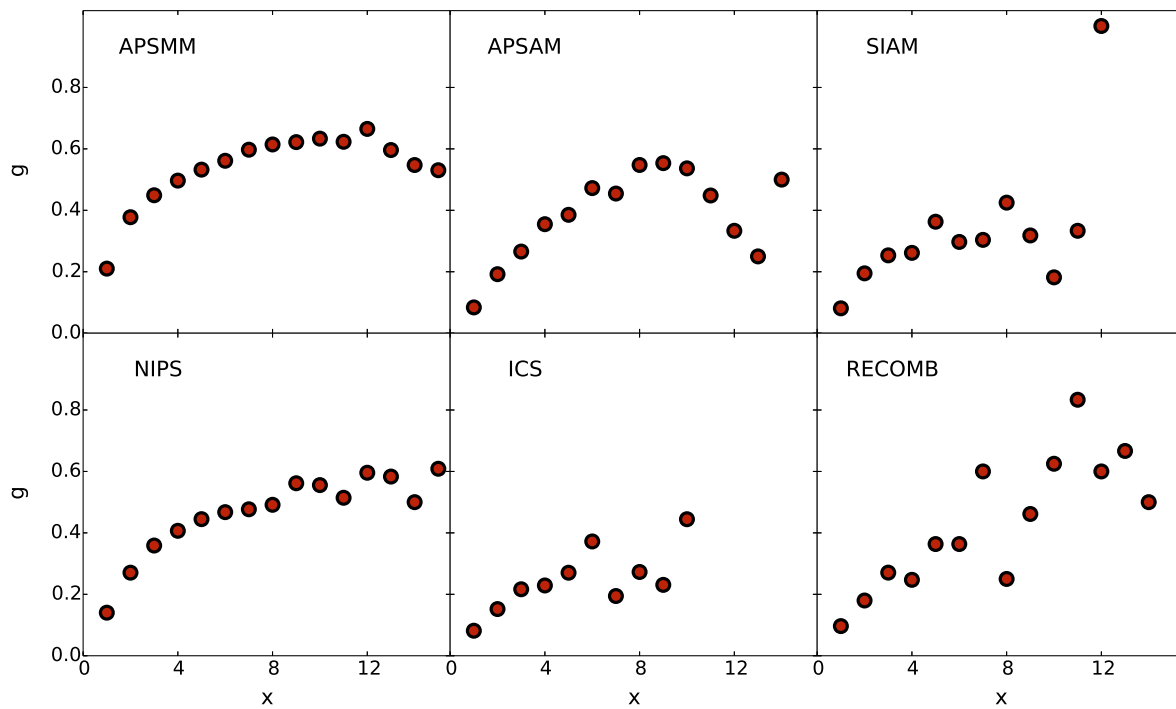

Figure A: Proportion of conference participants  $g$  with  $x$  conference attendances who are going to attend the conference next year.

Figure B shows how the probability to not attend the next meeting,  $\rho = 1 - g$ , increases with the number of non-participations,  $n$ , for the fixed number of previous participations  $x$ . We see that this probability is higher for smaller  $x$  and the same value of  $n$ .

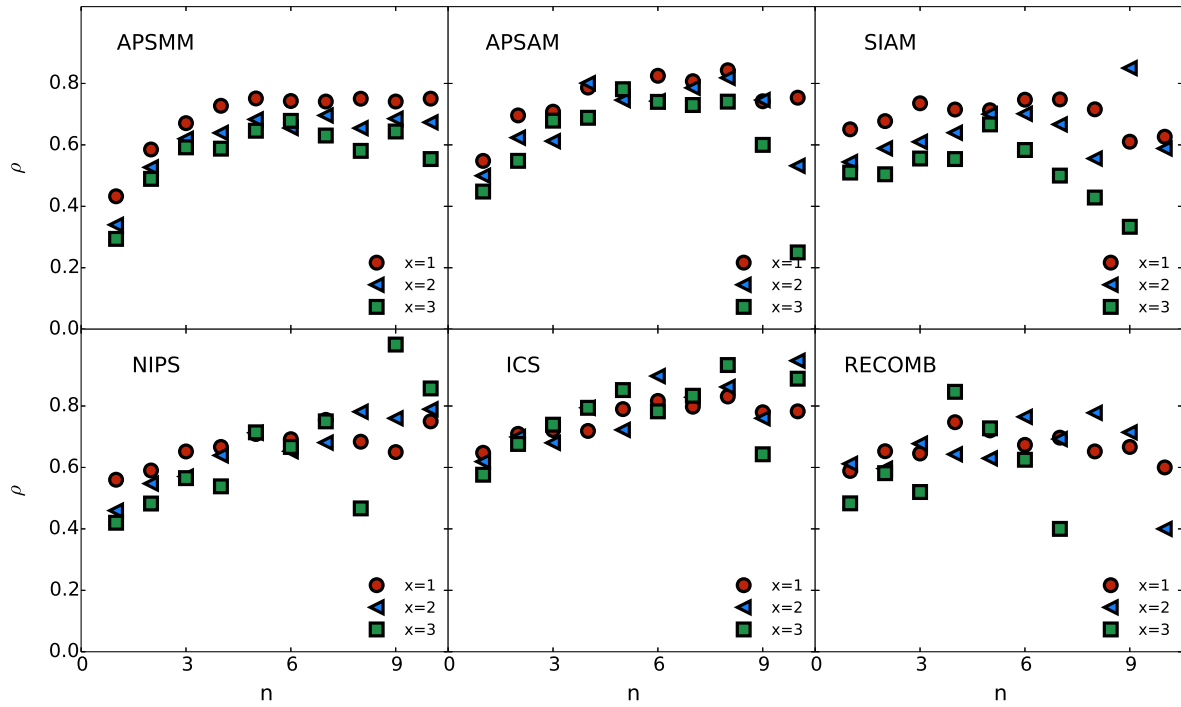

Figure B: Proportion of conference participants  $\rho$  with  $n$  missed conferences after  $x$ -th conference attendance who are going to skip the conference next year, but will take part at some future conference from the observation period.

### 3.2 Parameter estimation

The Table G shows the optimal parameter values of the model for the six different conferences. In Table H we show the estimated values of conference inclusiveness,  $g(1, 0)$ , and the order of the conferences according to this value and the value of exponent  $\alpha$ .

|        | $y_0$ | $H$   | $p$   |
|--------|-------|-------|-------|
| APSMM  | 2     | 0.165 | 1.550 |
| APSAM  | 4     | 0.135 | 1.700 |
| SIAM   | 4     | 0.155 | 1.525 |
| NIPS   | 3     | 0.130 | 1.525 |
| ICS    | 4     | 0.135 | 1.575 |
| RECOMB | 3     | 0.175 | 1.675 |

Table G: The optimal parameter values of the model for each conference.

|        | order | $1 - g(1, 0)$ | order | $\alpha$ |
|--------|-------|---------------|-------|----------|
| APSMM  | 1     | 0.2546        | 1     | 1.64     |
| APSAM  | 6     | 0.0865        | 6     | 2.62     |
| SIAM   | 4     | 0.1077        | 3     | 2.10     |
| NIPS   | 2     | 0.1577        | 2     | 1.93     |
| ICS    | 5     | 0.1012        | 5     | 2.51     |
| RECOMB | 3     | 0.137         | 4     | 2.31     |

Table H: Stagnancy rate  $1 - g(1, 0)$  at  $t = 1$  for each conference and exponent  $\alpha$  of power-law with an exponential cutoff distribution fit with the corresponding conference order.

### 3.3 Iterative method

The model evolution equations cannot be solved analytically, thus we use a numerical simulation and an iterative method. Here we explain the iterative method in details. Figure C is a schematic representation of the evolution process, which is a type of a Markovian process between states. Each state represents the number of participations. At each time step, the scientist can either attend a conference, with probability  $g(x, t - x)$ , and move one state right and increase the total number of participations, or not, and thus stay at the same state.



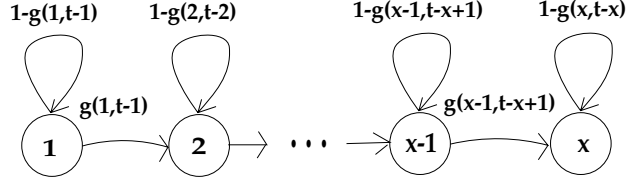

Figure C: Scheme of the evolution of the process through one time step.

To mathematically describe this evolution process we construct the transition probability matrices  $M(t)$  of sizes  $t \times t$ , with elements

$$M_{i,j}(t) = \begin{cases} 1 - g(i, (t-1) - i), & j = i \text{ and } i < t, \\ g(i, (t-1) - i), & j = i + 1 \text{ and } i < t, \\ 0, & \text{otherwise.} \end{cases}$$

for  $t \geq 2$  and  $M(t=1) = \mathbf{I}$  at  $t = 1$ . The diagonal elements  $M_{i,i}(t)$  define the probability that a participant who has  $i$  attendances on  $t-1$  conferences, does not attend conference at time  $t$ , while  $M_{i,i+1}(t)$  represents the probability for the transition  $i \rightarrow i+1$ . We assume that the termination time of a conference career  $T$  is the same for all participants and observe matrix

$$\mathcal{M} = M'(1)M'(2) \dots M'(T-1)M(T) \quad (1)$$

where  $M'(t)$  is the matrix  $M(t)$  expanded to the size  $T \times T$  by adding  $T-t$  zero rows and columns. The resulting matrix  $\mathcal{M}$  has non-zero elements at the first row, and other elements are 0. Each element  $\mathcal{M}_{1,i}$  of the matrix  $\mathcal{M}$  is the sum of all the possible combinations of attended and skipped conferences that result in  $i$  total participations at time  $T$ . Otherwise stated, the ratio of authors who attended  $i$  conferences is given by  $\mathcal{M}_{1,i}$ .

Based on this consideration, we next examine the probability distribution of the total number of participations when the termination of attendance occurs at random with some constant probability  $H$ . We generate matrices  $\mathcal{M}(t)$ :

- $t = 1, \mathcal{M}(1) = HM(1)$ ;
- $t = 2, \mathcal{M}(2) = [\frac{1-H}{H}M'(1)] [HM(2)]$ ;
- $t = 3, \mathcal{M}(3) = [\frac{1-H}{H}\mathcal{M}'(2)] [HM(3)]$ ;
- $t = T_{max}, \mathcal{M}(T_{max}) = [\frac{1-H}{H}\mathcal{M}'(T_{max}-1)] [HM(T_{max})]$ ;

where  $\mathcal{M}'(t)$  is the matrix  $\mathcal{M}(t)$  expanded to the size  $t+1 \times t+1$  by adding a zero row and column. Each of elements  $\mathcal{M}_{1,i}(t)$  of the matrix  $\mathcal{M}(t)$  gives a ratio of participants that terminated their conference career at time  $t$  with  $i$  participations. We can choose  $T_{max}$  to stop the calculation when  $\sum_{i=1}^{T_{max}} \mathcal{M}_{1,i}(T_{max}) \rightarrow 0$ . Then, probability distribution of the total number of participations  $P(x)$  is obtained by summing over all possible career termination times

$$P(x) = \sum_{t=1}^{T_{max}} \mathcal{M}_{1,x}(t). \quad (2)$$

## References

- [1] A. Clauset, C. R. Shalizi, and M. E. J. Newman, “Power-law distributions in empirical data,” *SIAM Review*, vol. 51, no. 4, pp. 661–703, 2009.
